# Supplementary material for: Spectroscopic investigation of bio-mimetic solvolysis of 6-(N,N-dimethylamino)-2,3-naphthalic anhydride in confined nanocavities
Source: Royal Society of Chemistry journal article supplement (doi:10.1039/c6cp08009j), 2017-01-01
Supplement: c6cp08009j1.pdf [file c6cp08009j1.pdf]

## Electronic Supporting Information

### Spectroscopic Investigation of Bio-mimetic Solvolysis of 6-(*N,N*-dimethylamino)-2,3-naphthalic Anhydride in Confined Nanocavities

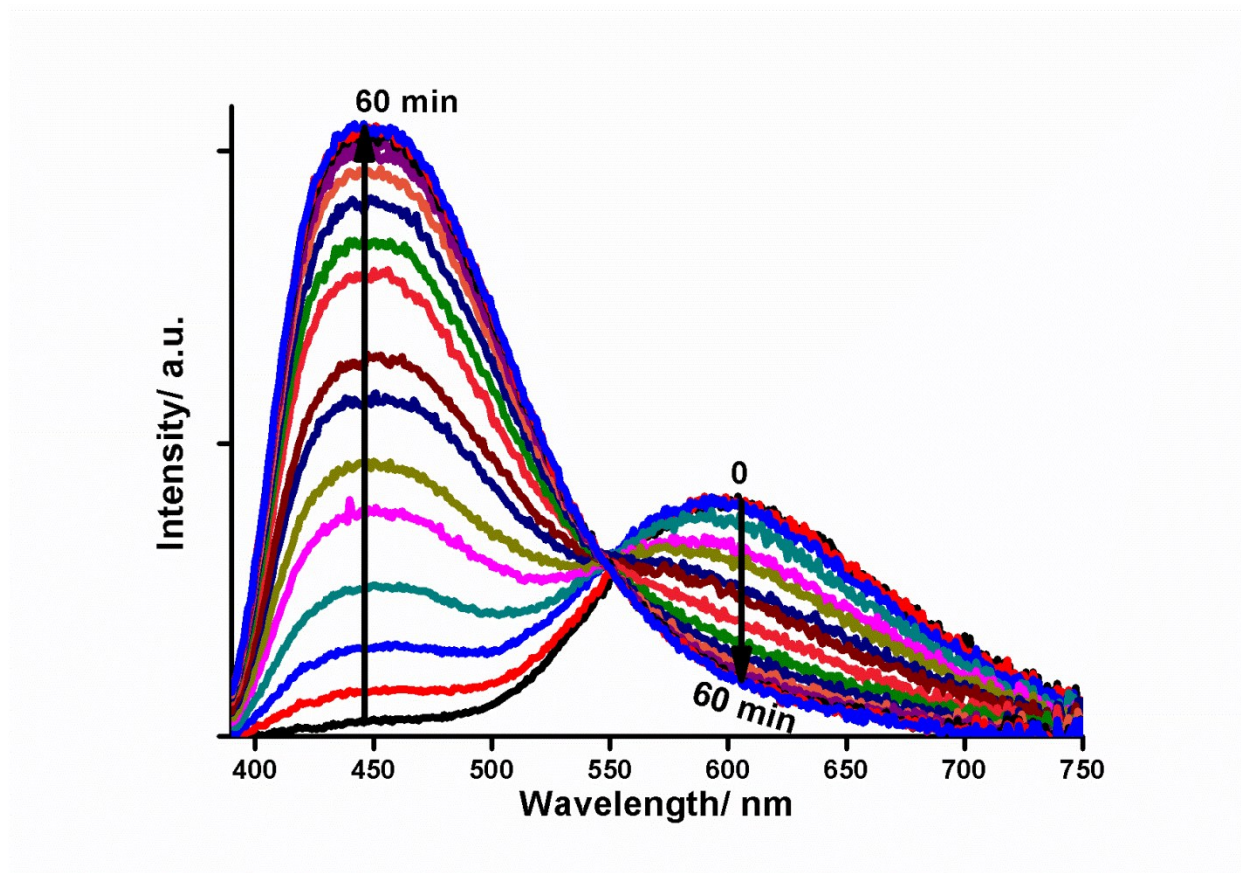

**Figure S1:** Steady state fluorescence spectra of solvolysis of DMN-Anh in ethanol at 45 °C

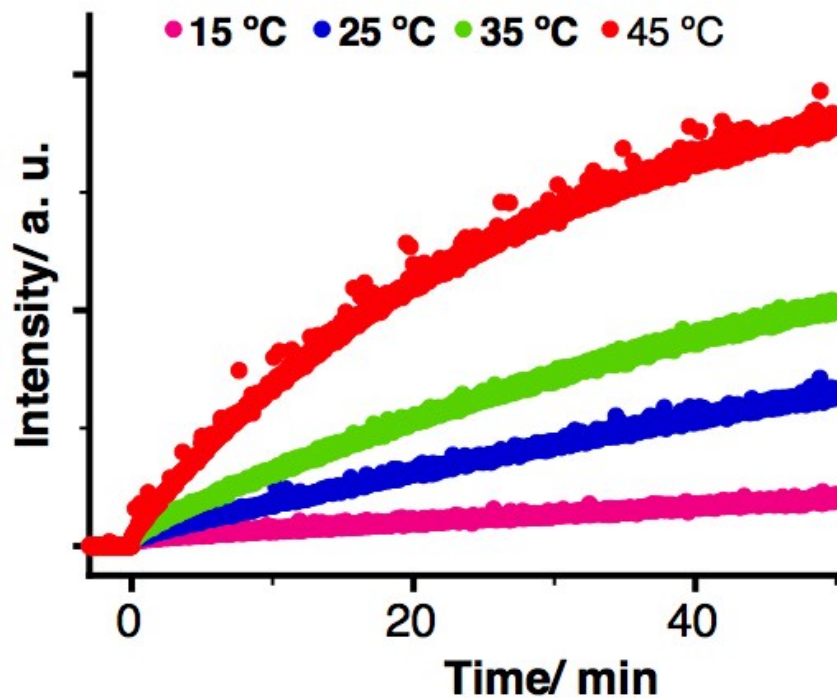

**Figure S2:** Kinetics of DMN-Anh in ethanol at different temperatures monitoring the fluorescence intensity at 450 nm

**Table S1:** Temperature dependent rate constant values in case of MeOH and BuOH

| k (MeOH) | lnk (MeOH)<br>(min <sup>-1</sup> ) | k (BuOH) | lnk (BuOH)<br>(min <sup>-1</sup> ) | 1/T<br>(K <sup>-1</sup> ) |
|----------|------------------------------------|----------|------------------------------------|---------------------------|
| 460000   | 13.03898                           | 2680.3   | 7.89368                            | 3.14000e-3                |
| 280000   | 12.54254                           | 1641.8   | 7.40355                            | 3.24700e-3                |
| 170000   | 12.04355                           | 898.0    | 6.80017                            | 3.36000e-3                |
| 67000    | 11.11245                           | 647.0    | 6.47235                            | 3.47000e-3                |

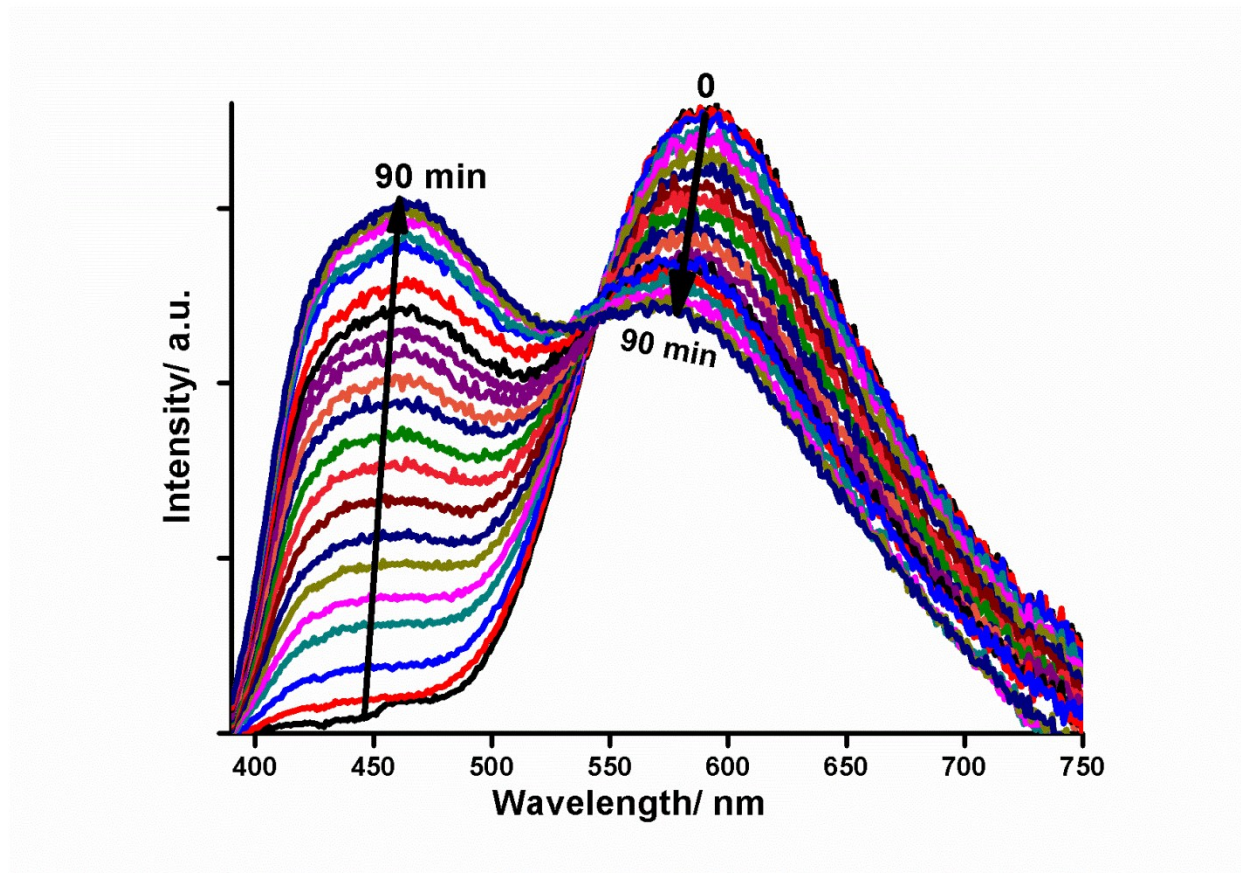

**Figure S3:** Steady state fluorescence spectra of solvolysis of DMN-Anh in propanol at 25 °C

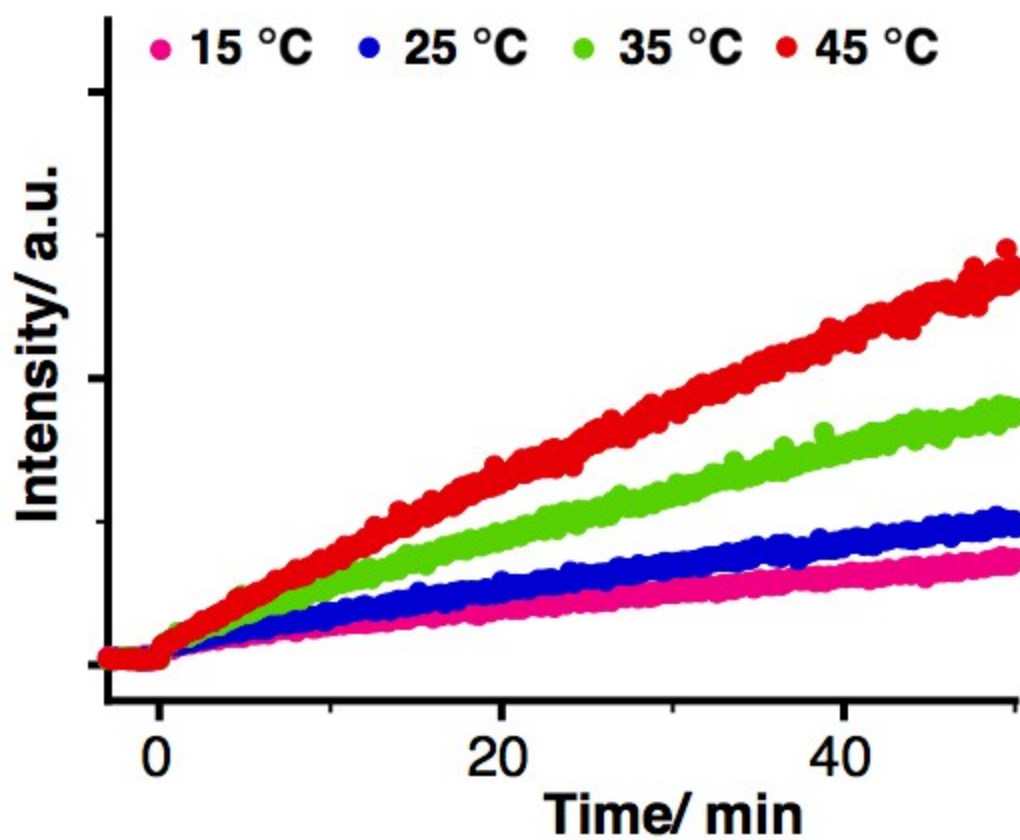

**Figure S4:** Kinetics of DMN-Anh in propanol at different temperatures monitoring the fluorescence intensity at 450 nm

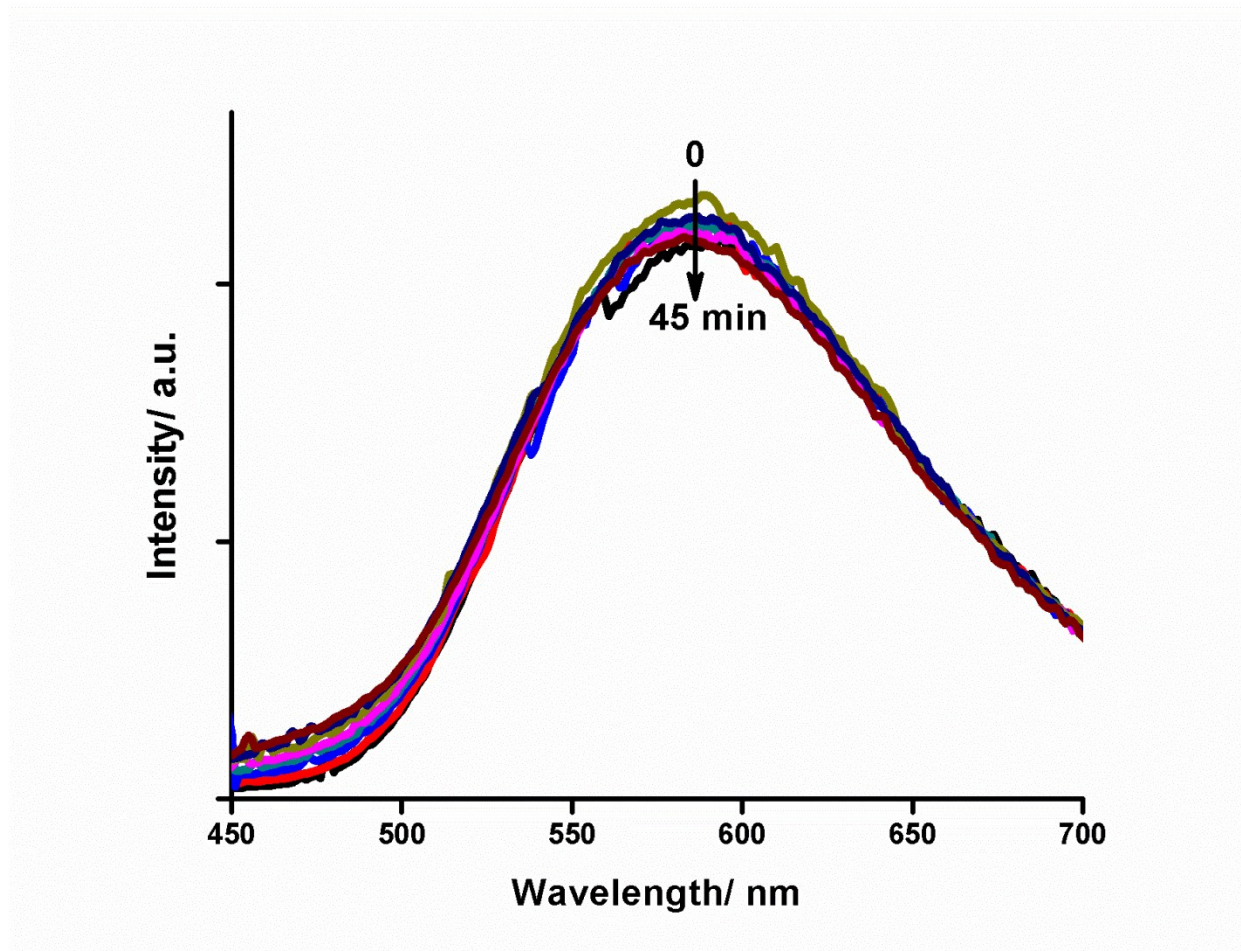

**Figure S5:** Steady state fluorescence spectra of solvolysis of DMN-Anh in *n*-butanol at 45 °C

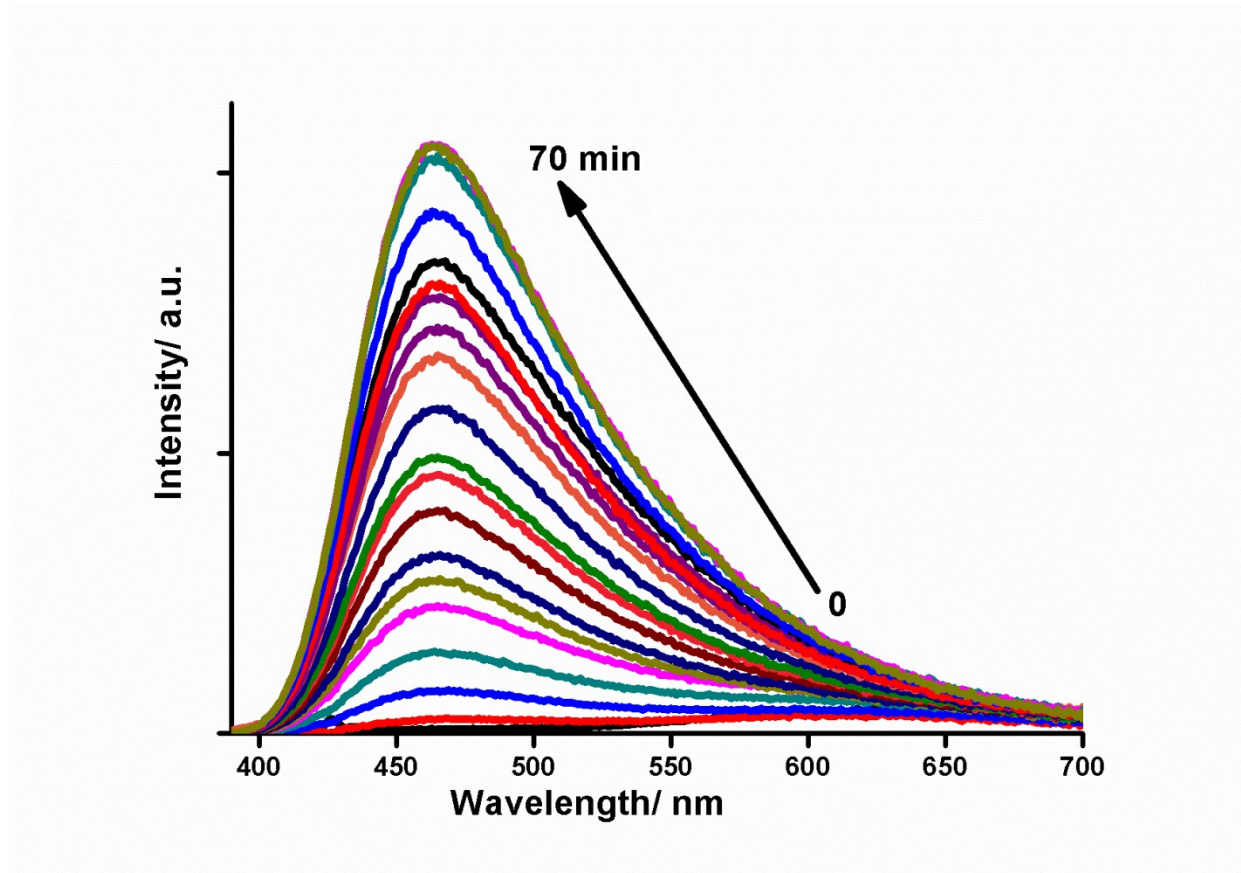

**Figure S6:** Steady state fluorescence spectra of solvolysis of DMN-Anh in ethylene glycol at 15 °C

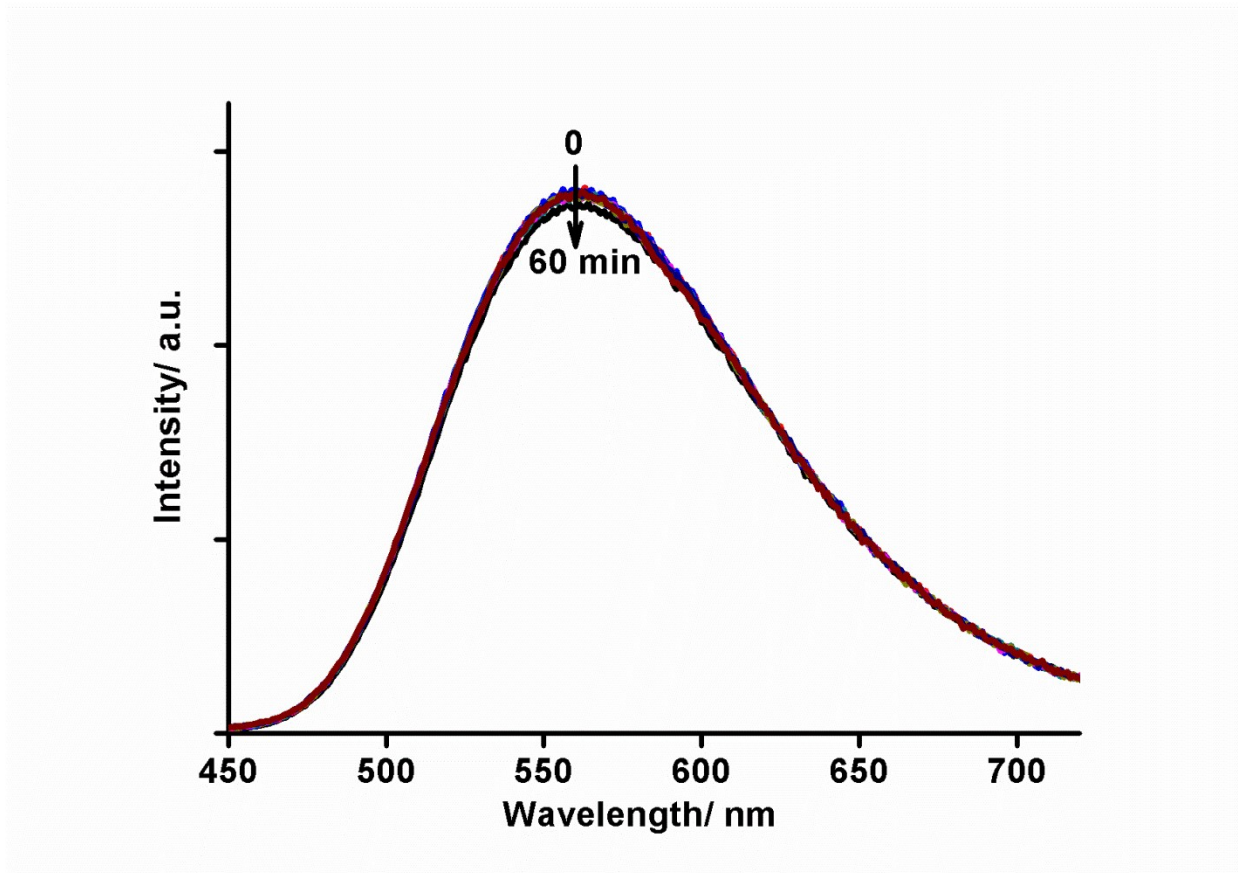

**Figure S7:** Steady state fluorescence spectra of solvolysis of DMN-Anh in *tert*-Butanol at 45 °C

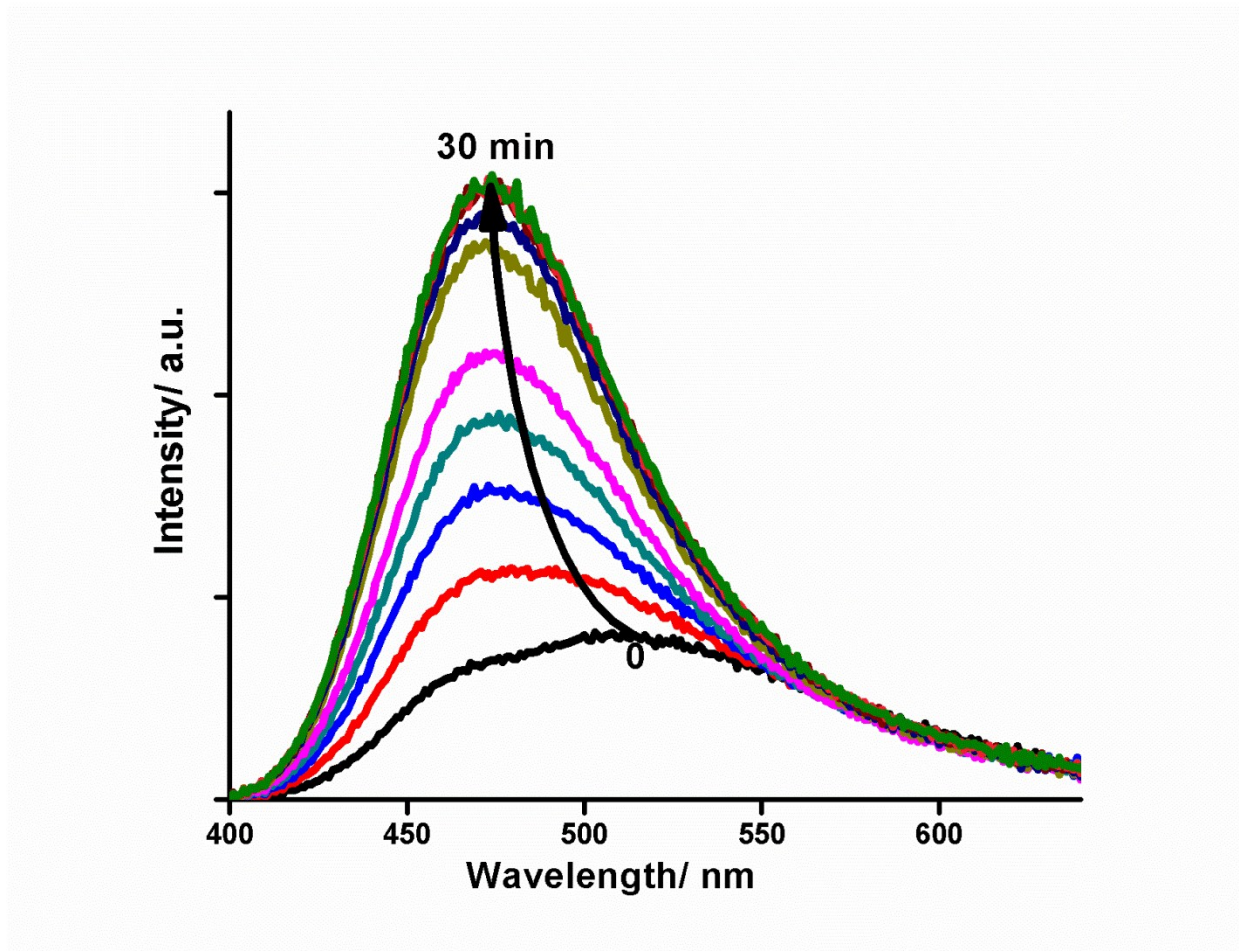

**Figure S8:** Steady state fluorescence spectra of hydrolysis of DMN-Anh in water at 45 °C



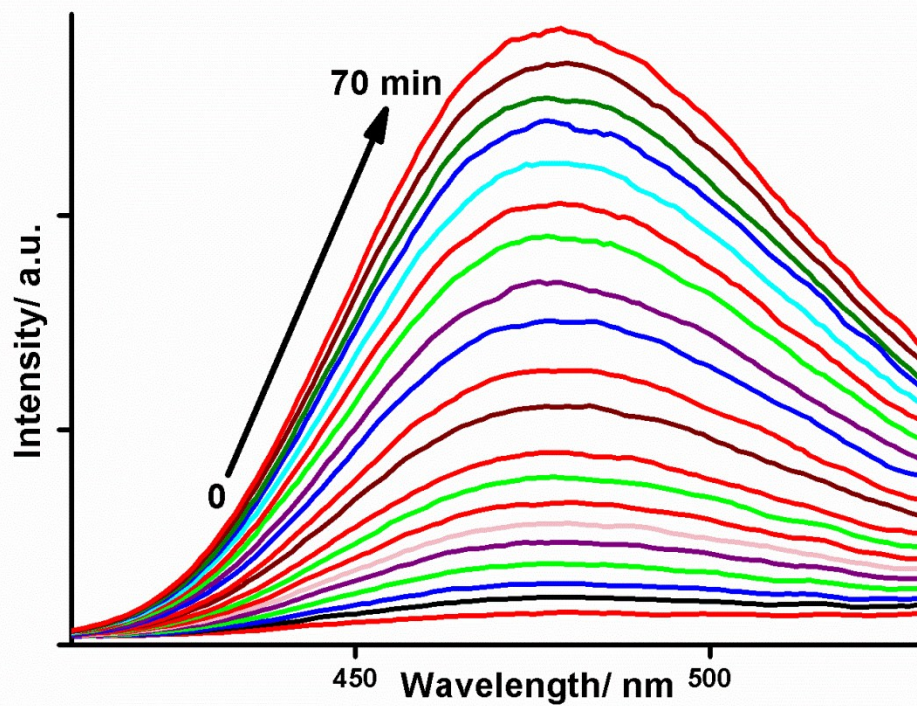

**Figure S9:** Steady state fluorescence spectra of hydrolysis of DMN-Anh in water in presence of 20 mM SDS at 25 °C

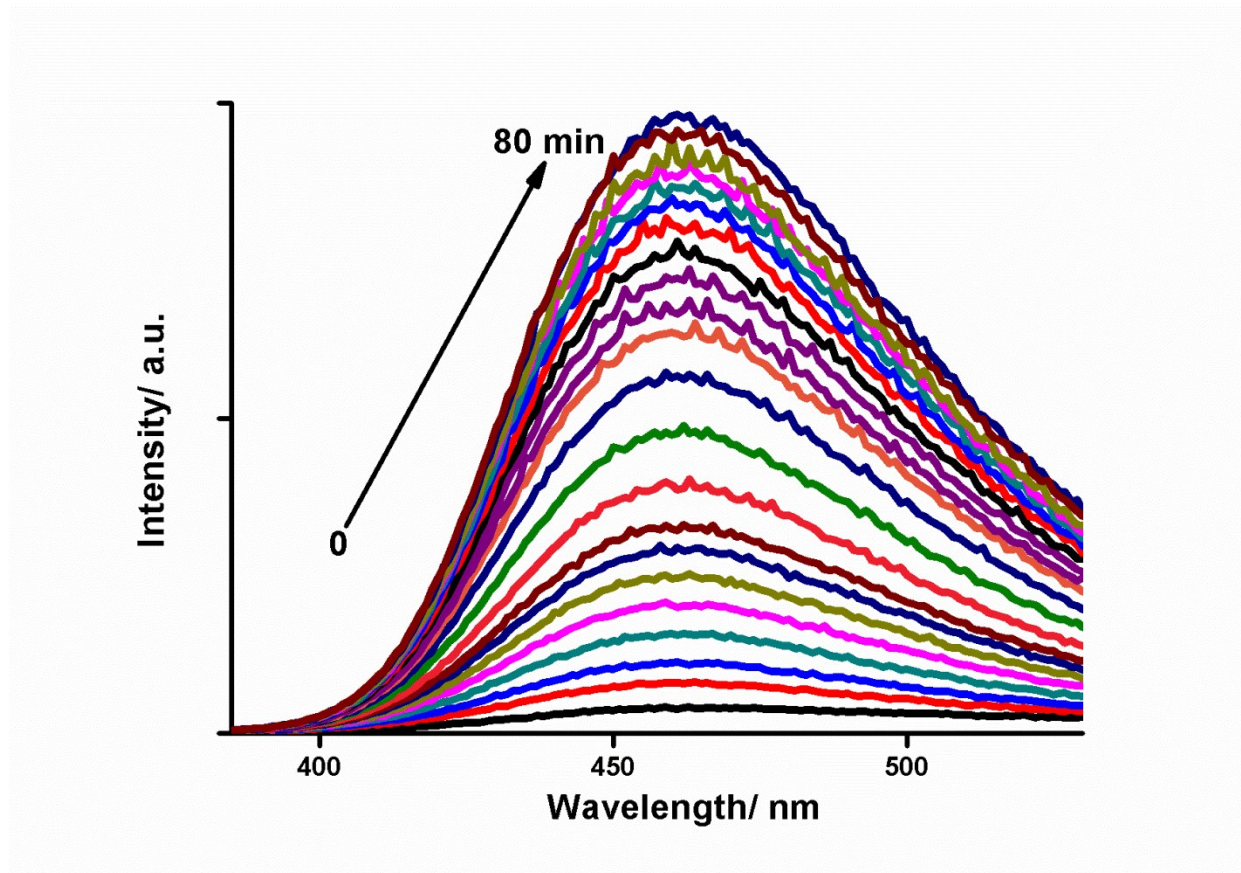

**Figure S10:** Steady state fluorescence spectra of hydrolysis of DMN-Anh in water in presence of 4 mM CTAB at 25 °C

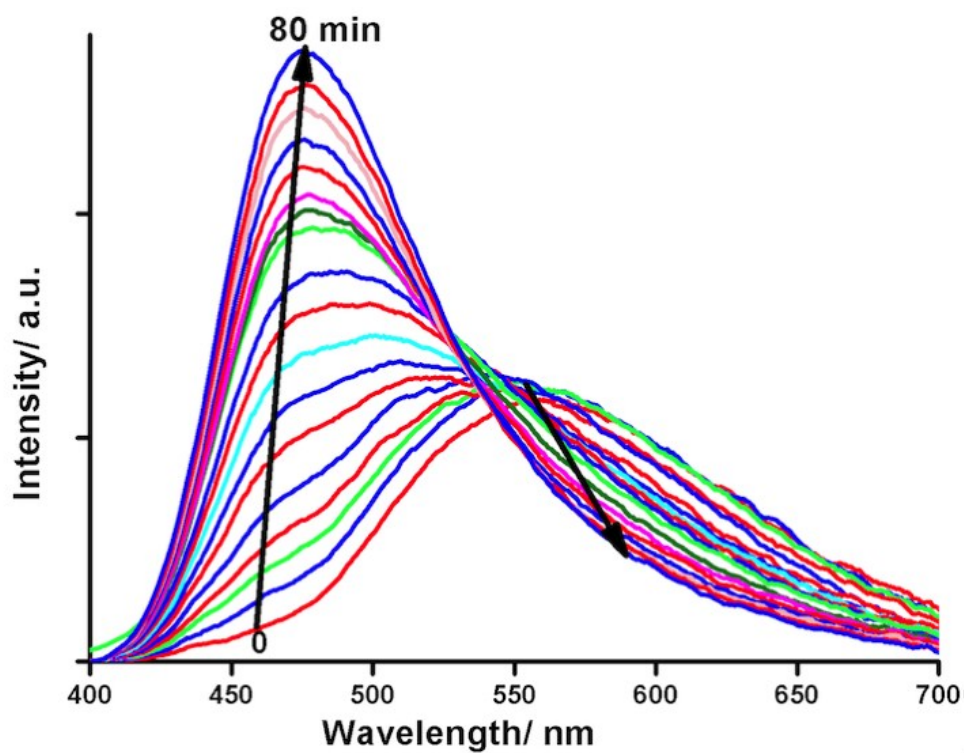

**Figure S11:** Steady state fluorescence spectra of hydrolysis of DMN-Anh in water in presence of 2 mM TX-100 at 25 °C

### **Mass Spectra of Methanolysis Product of DMN-Anh**

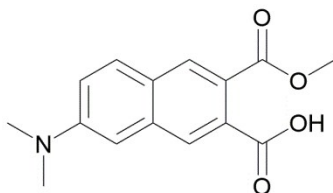

LC-MS REPORT  
IISER - BHOPAL

```

=====
Data file       : D:\DATA_2014\DATA\ROHITH\ME.D
Injection Date  : 3/29/2016
Sample Name     : ME
Acq Method      : D:\DATA_2014\METHODS\MAHESH\MIDPOLAR_DM.M
Vial No.       : Vial 32
Injection vol   : 5.00 ul
=====

```

!\*\*\*\*\* error in user defined macro: USR\_ADConly\*\*\*\*\*!

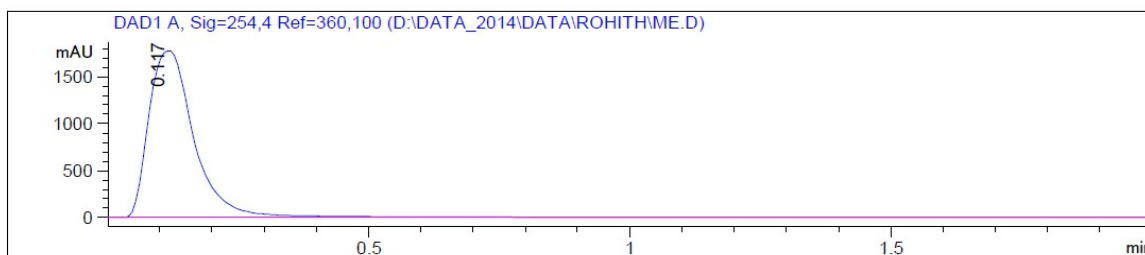

| Peak No | RT min | Area       | Area %  |
|---------|--------|------------|---------|
| 1       | 0.117  | 1.092e+004 | 100.000 |

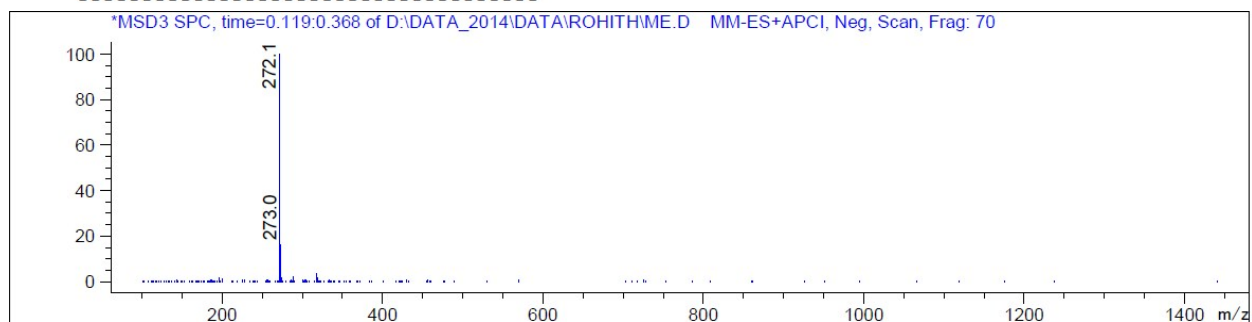

**Figure S12:** Exact mass (M) calculated 273.1, mass obtained in negative mode 272.1 (M<sup>-</sup> ion), and 273.0 (M)

## Mass Spectra of Ethanolysis Product of DMN-Anh

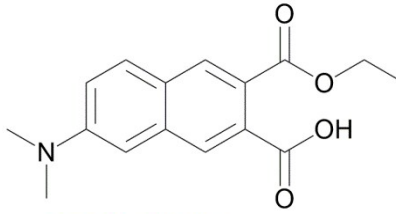

LC-MS REPORT  
IISER - BHOPAL

```

=====
Data file       : D:\DATA_2014\DATA\ROHITH\EA.D
Injection Date  : 3/29/2016
Sample Name     : EA
Acq Method     : D:\DATA_2014\METHODS\MAHESH\MIDPOLAR_DM.M
Vial No.       : Vial 31
Injection vol   : 5.00 ul
=====

```

!\*\*\*\*\* error in user defined macro: USR\_ADOnly\*\*\*\*\*!

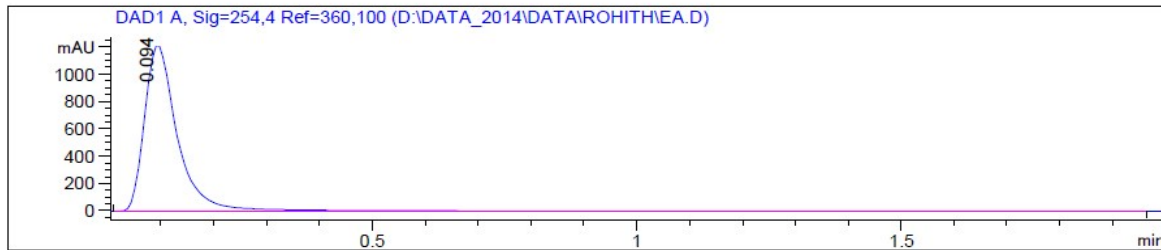

| Peak No | RT min | Area       | Area %  |
|---------|--------|------------|---------|
| 1       | 0.094  | 5.433e+003 | 100.000 |

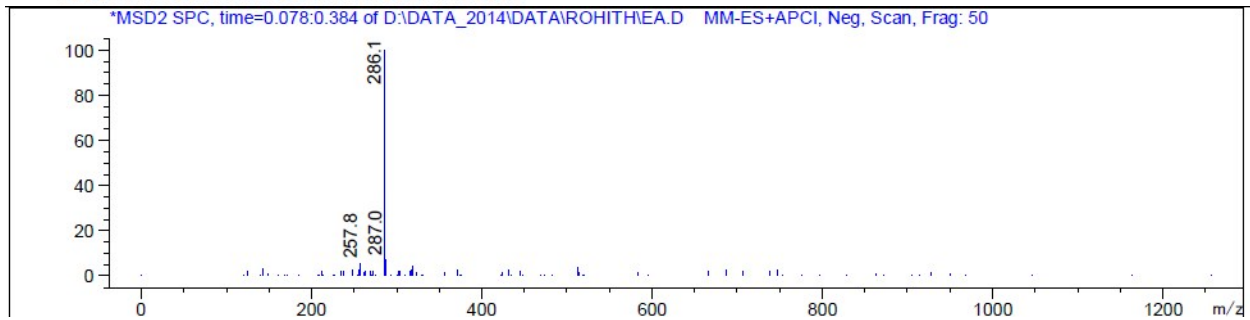

**Figure S13:** Exact mass (M) calculated 287.1, mass obtained in negative mode 286.1 ( $M^-$  ion), and 287.0 (M)
